# Supplementary material for: Nwd1 regulates neuronal differentiation and migration through purinosome formation in the developing cerebral cortex
Source: bioRxiv or medRxiv preprint supplement (doi:10.1101/2019.12.15.877340), 2020-01-22
Supplement: Supplementary file [file media-2.pdf]

| Gene name                                                                                                         | Gene Symbol | NCBI Reference Sequence: protein | Identified protein region (amino acids)  | protein function                                         |
|-------------------------------------------------------------------------------------------------------------------|-------------|----------------------------------|------------------------------------------|----------------------------------------------------------|
| abhydrolase domain containing 3                                                                                   | Abhd3       | NP_598891.1                      | 350–411 aa                               | unknown, paralog of Abhd1                                |
| ATP-binding cassette, sub-family D (ALD), member 3                                                                | Abcd3       | NP_033017.2                      | 530–659 aa                               | peroxisomal import of fatty acids and/or fatty acyl-CoAs |
| chymotrypsin-like elastase family, member 1                                                                       | Cela1       | NP_291090.2                      | 14–155 aa                                | protease associated with elastin remodeling              |
| clavesin 2                                                                                                        | Clvs2       | NP_001346068.1                   | 35–181 aa                                | recycling of synaptic vesicles                           |
| Kin17 DNA and RNA binding protein                                                                                 | Kin         | NP_079556.1                      | 1–188 aa                                 | DNA/RNA binding protein                                  |
| phosphoribosylaminoimidazole carboxylase, phosphoribosylaminoribosylaminoimidazole, succinocarboxamide synthetase | Paics       | NP_080215.1                      | 323–425 aa,<br>312–425 aa,<br>305–425 aa | <i>De novo</i> purine synthesis enzymes                  |
| quaking                                                                                                           | Qk          | NP_001152988.1                   | 130–319 aa                               | RNA-binding protein                                      |
| serine (or cysteine) peptidase inhibitor, clade E, member 2                                                       | Serpine2    | NP_033281.1                      | 307–397 aa                               | inhibitor for serine proteases                           |
| serine palmitoyltransferase, small subunit A                                                                      | Sptssa      | NP_598815.2                      | 10–71 aa                                 | serine palmitoyltransferase isoenzymes                   |
| E26 avian leukemia oncogene 1, 5' domain                                                                          | Ets1        | NP_001359463.1                   | 1–111 aa                                 | transcription factor                                     |
| tripeptidyl peptidase II                                                                                          | Tpp2        | NP_033444.1                      | 1171–1261 aa                             | serine exopeptidase                                      |
| WD repeat domain 74                                                                                               | Wdr74       | NP_598900.1                      | 114–378 aa                               | regulator of exosome complex formation                   |
