# Supplementary material for: Nwd1 regulates neuronal differentiation and migration through purinosome formation in the developing cerebral cortex
Source: bioRxiv or medRxiv preprint supplement (doi:10.1101/2019.12.15.877340), 2020-01-22

A

control  
shRNA      shRNA #1      shRNA #2

Nwd1

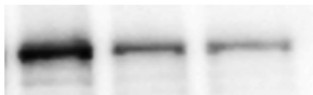

$\alpha$ -Tubulin

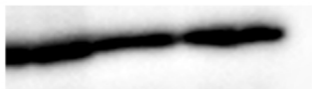

EGFP/Nwd1/Hoechst

EGFP+  
control shRNA

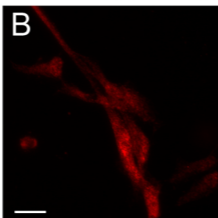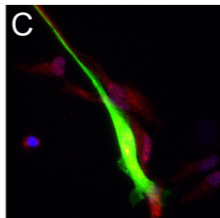

EGFP+  
Nwd1 shRNA

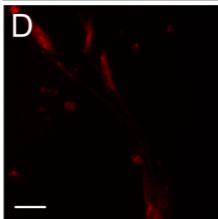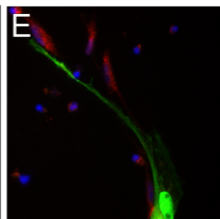

Supplement: Supplementary file [file media-3.pdf]
