# Supplementary material for: Nwd1 regulates neuronal differentiation and migration through purinosome formation in the developing cerebral cortex
Source: bioRxiv or medRxiv preprint supplement (doi:10.1101/2019.12.15.877340), 2020-01-22
Supplement: Supplementary file [file media-4.pdf]

E18.5 (electroporation E14.5)

control shRNA

Nwd1 shRNA

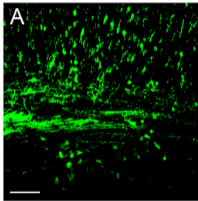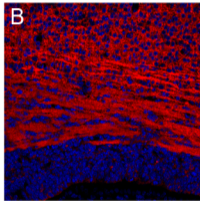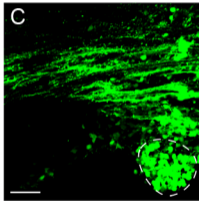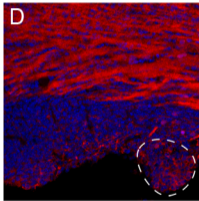

EGFP/ $\beta$  tubulin III/Hoechst
