# Supplementary material for: Nwd1 regulates neuronal differentiation and migration through purinosome formation in the developing cerebral cortex
Source: bioRxiv or medRxiv preprint supplement (doi:10.1101/2019.12.15.877340), 2020-01-22

P7 (electroporation E14.5)

EGFP+Nwd1 shRNA

EGFP/Hoechst

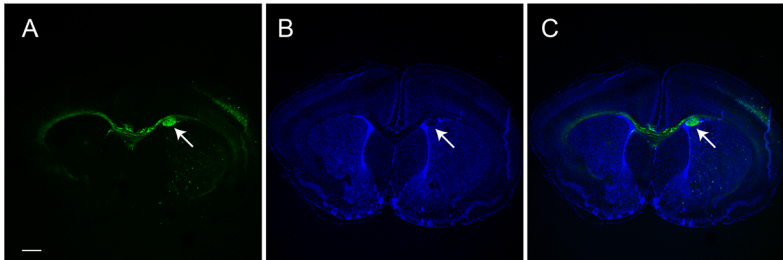

Supplement: Supplementary file [file media-5.pdf]
