# Supplementary material for: Nwd1 regulates neuronal differentiation and migration through purinosome formation in the developing cerebral cortex
Source: bioRxiv or medRxiv preprint supplement (doi:10.1101/2019.12.15.877340), 2020-01-22

A

control  
shRNA

shRNA #1

shRNA #2

shRNA #3

Paics

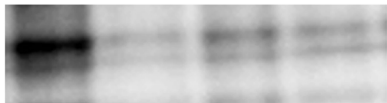

$\alpha$ -Tubulin

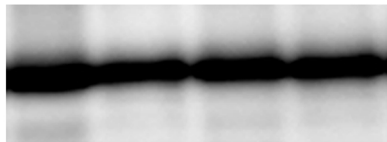

Supplement: Supplementary file [file media-6.pdf]
