# Supplementary material for: Nwd1 regulates neuronal differentiation and migration through purinosome formation in the developing cerebral cortex
Source: bioRxiv or medRxiv preprint supplement (doi:10.1101/2019.12.15.877340), 2020-01-22

E16.5 (electroporation E14.5)

Fgams-EGFP

EGFP/Nestin

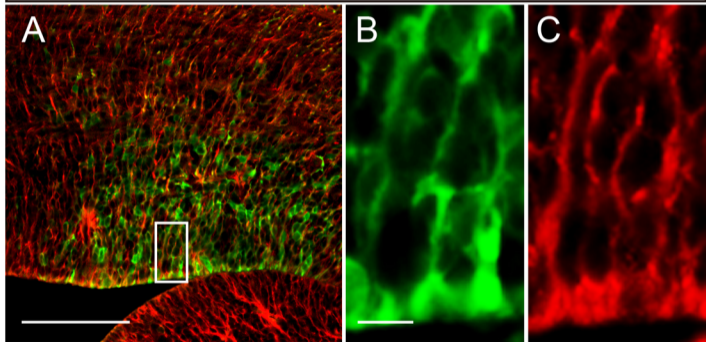

Supplement: Supplementary file [file media-7.pdf]
